# Supplementary material for: Optical photothermal infrared (OPTIR) spectroscopy assisted by machine learning for lactic acid bacteria identification at strain level
Source: Royal Society of Chemistry journal article supplement (doi:10.1039/d5an01093d), 2026-01-01
Supplement: d5an01093d1.pdf [file d5an01093d1.pdf]

## Supplementary data:

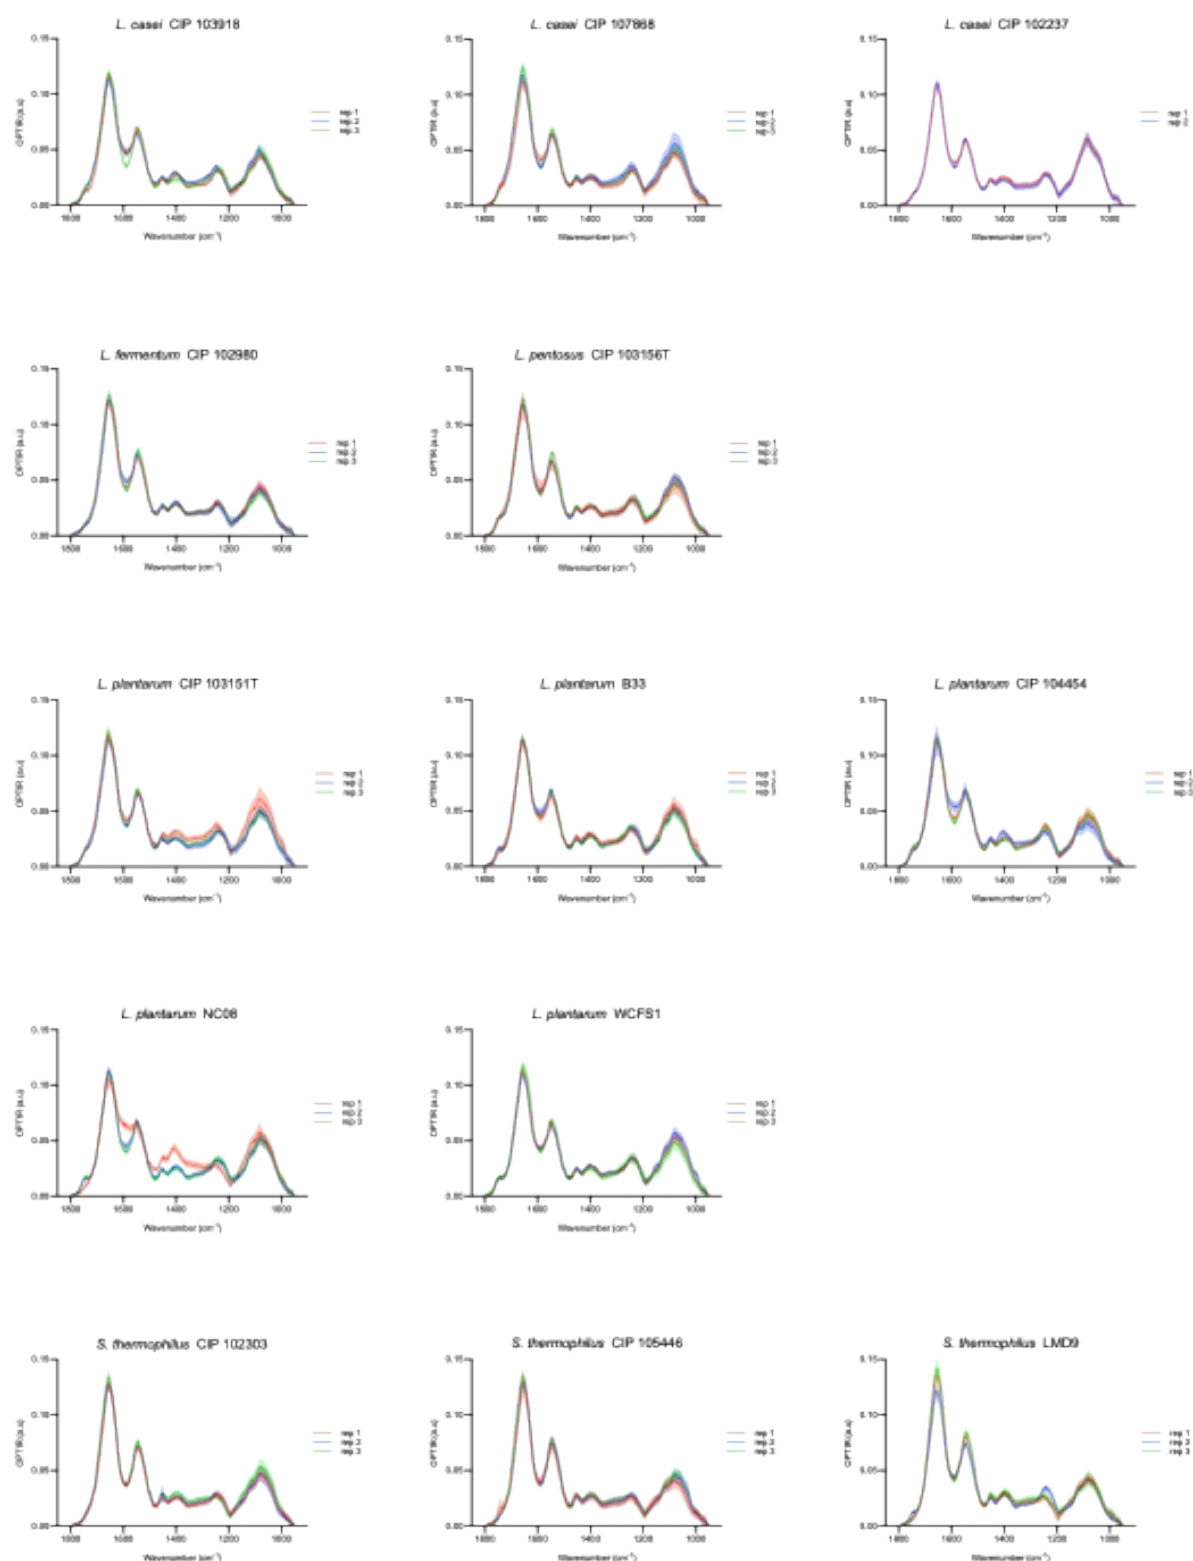

**Figure S1:** Layout of overlay of average OPTIR spectra (region: 1800 - 950  $\text{cm}^{-1}$ ) of all 13 strains replicates (red: replicate 1; blue: replicate 2; green: replicate 3). Spectra were vector-normalised, smoothed using the Savitzky-Golay algorithm (window size = 9, polynomial order = 2). The line represents the average (mean) spectrum for each replicate, the shaded area represents standard deviation.

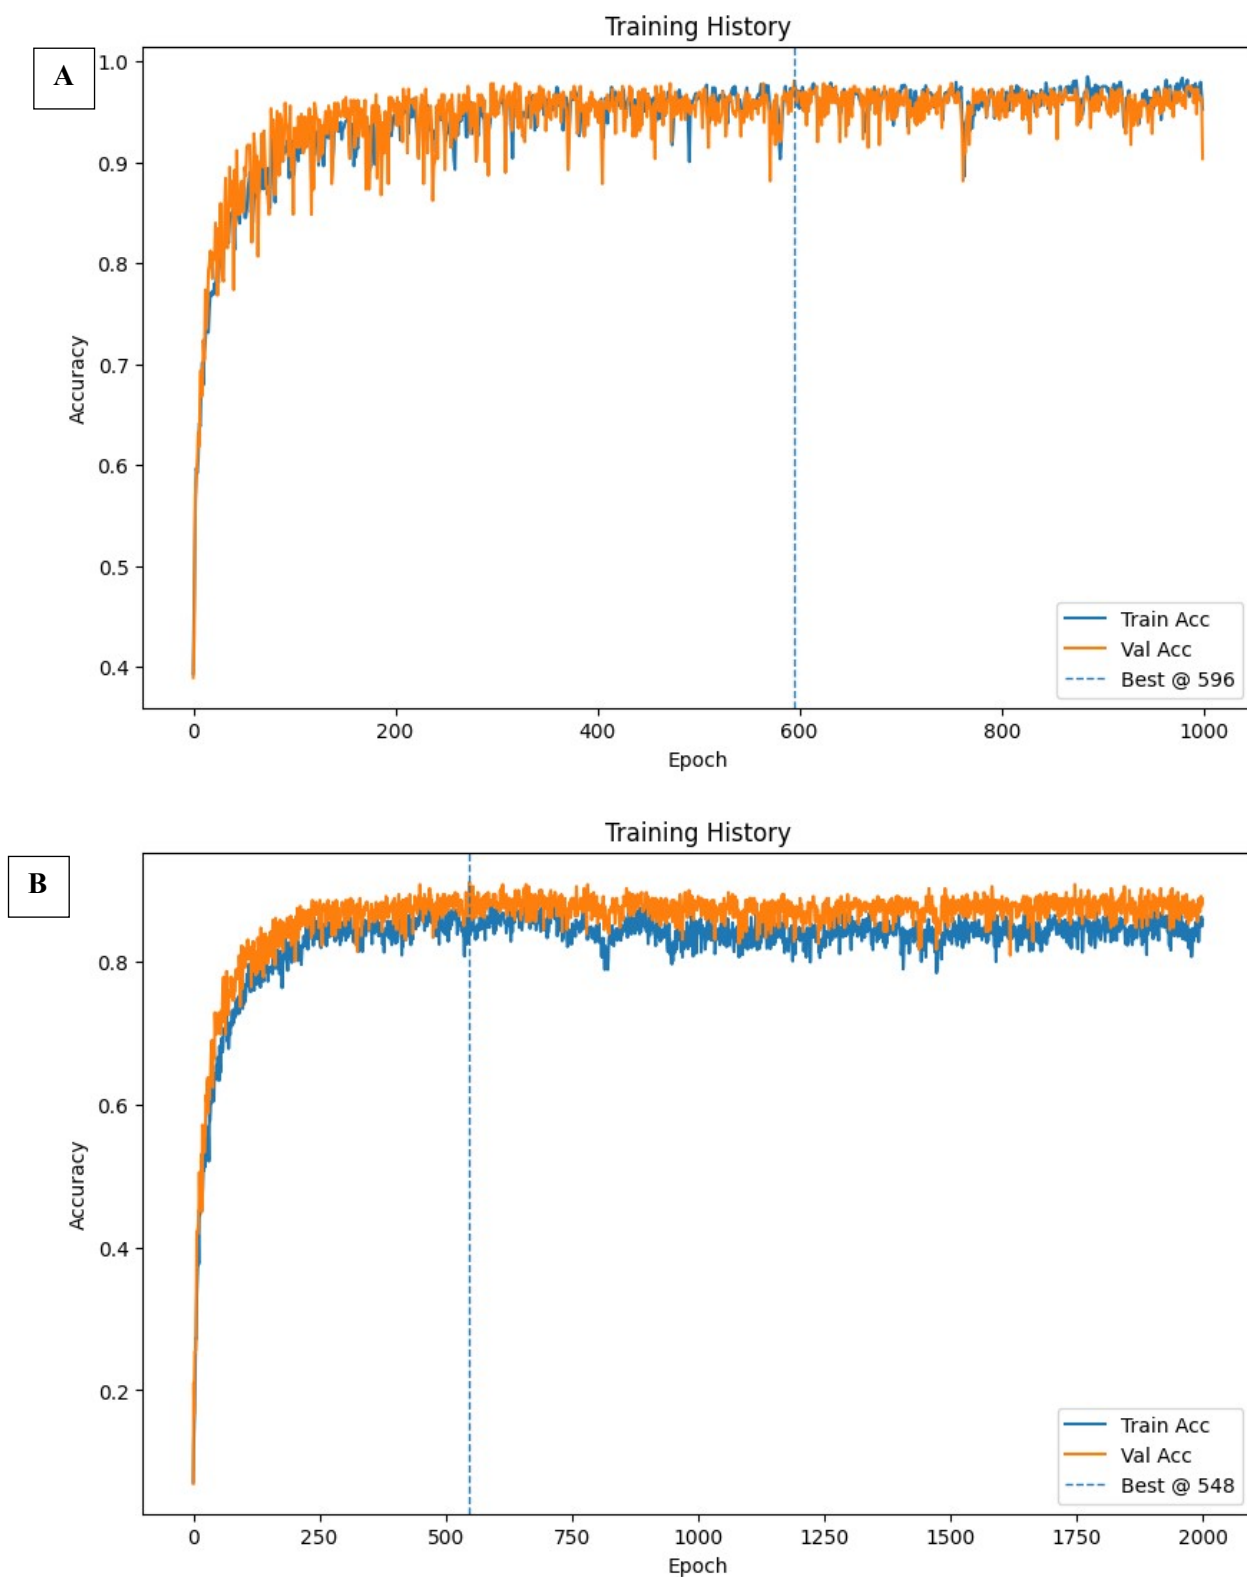

**Figure S2:** Training/validation accuracy histories to determine best hyperparameters: (A) on species level set (B) on strain level set.
